# Supplementary material for: Injury incidence within male elite New Zealand cricket from the early T20 era: 2009–2015
Source: HighWire-hosted journal article supplement (doi:10.1136/bmjsem-2021-001168), 2021-11-01
Supplement: bmjsem-2021-001168supp001_data_supplement.pdf [file bmjsem-2021-001168supp001_data_supplement.pdf]

## SUPPLEMENTAL MATERIAL

**Table S1** Number match days per format per season

|                      | 2009/2010 | 2010/2011 | 2011/2012 | 2012/2013 | 2013/2014 | 2014/2015 | Total |
|----------------------|-----------|-----------|-----------|-----------|-----------|-----------|-------|
| <b>Domestic</b>      |           |           |           |           |           |           |       |
| <b>T20</b>           | 58        | 53        | 78        | 64        | 55        | 64        | 372   |
| <b>One Day</b>       | 55        | 50        | 51        | 51        | 48        | 52        | 307   |
| <b>First Class</b>   | 216       | 220       | 217       | 228       | 228       | 233       | 1342  |
| <b>International</b> |           |           |           |           |           |           |       |
| <b>T20</b>           | 19        | 3         | 8         | 18        | 10        | 2         | 60    |
| <b>One Day</b>       | 6         | 31        | 8         | 21        | 15        | 26        | 107   |
| <b>Test</b>          | 29        | 22        | 29        | 53        | 30        | 23        | 186   |

**Table S2** Number of injuries per body region per season

|                      | 2009/2010 | 2010/2011 | 2011/2012 | 2012/2013 | 2013/2014 | 2014/2015 | Total |
|----------------------|-----------|-----------|-----------|-----------|-----------|-----------|-------|
| <b>Domestic</b>      |           |           |           |           |           |           |       |
| <b>Head/neck</b>     | 1         | 2         | 4         | 2         | 1         | 2         | 12    |
| <b>Upper limb</b>    | 16        | 15        | 10        | 16        | 15        | 18        | 90    |
| <b>Trunk</b>         | 12        | 12        | 17        | 14        | 11        | 16        | 82    |
| <b>Lower limb</b>    | 28        | 35        | 28        | 33        | 38        | 30        | 192   |
| <b>Illness</b>       | 2         | 5         | 4         | 2         | 3         | 4         | 20    |
| <b>Unconfirmed</b>   | 8         | 10        | 2         | 0         | 0         | 0         | 20    |
| <b>International</b> |           |           |           |           |           |           |       |
| <b>Head/neck</b>     | 2         | 1         | 0         | 0         | 0         | 1         | 4     |
| <b>Upper limb</b>    | 5         | 2         | 1         | 4         | 3         | 6         | 21    |
| <b>Trunk</b>         | 4         | 6         | 2         | 7         | 3         | 2         | 24    |
| <b>Lower limb</b>    | 15        | 15        | 6         | 17        | 5         | 7         | 65    |
| <b>Illness</b>       | 0         | 5         | 2         | 3         | 0         | 0         | 10    |
| <b>Unconfirmed</b>   | 0         | 0         | 1         | 1         | 0         | 0         | 2     |

| <b>Table S3</b> Number of match days lost per body region per season |                  |                  |                  |                  |                  |                  |              |
|----------------------------------------------------------------------|------------------|------------------|------------------|------------------|------------------|------------------|--------------|
|                                                                      | <b>2009/2010</b> | <b>2010/2011</b> | <b>2011/2012</b> | <b>2012/2013</b> | <b>2013/2014</b> | <b>2014/2015</b> | <b>Total</b> |
| <b>Domestic</b>                                                      |                  |                  |                  |                  |                  |                  |              |
| <b>Head/neck</b>                                                     | 3                | 3                | 9                | 3                | 1                | 16               | 35           |
| <b>Upper limb</b>                                                    | 121              | 107              | 72               | 154              | 140              | 178              | 772          |
| <b>Trunk</b>                                                         | 133              | 125              | 247              | 167              | 120              | 174              | 966          |
| <b>Lower limb</b>                                                    | 298              | 351              | 289              | 263              | 301              | 356              | 1858         |
| <b>Illness</b>                                                       | 2                | 19               | 8                | 21               | 3                | 16               | 69           |
| <b>Unconfirmed</b>                                                   | 21               | 61               | 34               | 0                | 0                | 0                | 116          |
| <b>International</b>                                                 |                  |                  |                  |                  |                  |                  |              |
| <b>Head/neck</b>                                                     | 3                | 2                | 0                | 0                | 0                | 2                | 7            |
| <b>Upper limb</b>                                                    | 69               | 5                | 16               | 21               | 15               | 13               | 139          |
| <b>Trunk</b>                                                         | 23               | 22               | 55               | 22               | 14               | 21               | 157          |
| <b>Lower limb</b>                                                    | 180              | 104              | 85               | 125              | 41               | 23               | 558          |
| <b>Illness</b>                                                       | 0                | 5                | 2                | 4                | 0                | 0                | 11           |
| <b>Unconfirmed</b>                                                   | 0                | 0                | 12               | 1                | 0                | 0                | 13           |
